# Supplementary material
Source: Springer Nature journal article supplement (https://www.springermedizin.de/resource/supplementary/12879_2012_1988_MOESM4_ESM.pdf/9443510)

1 2 3 4 5 6 7 8 9 10

← 155 bp

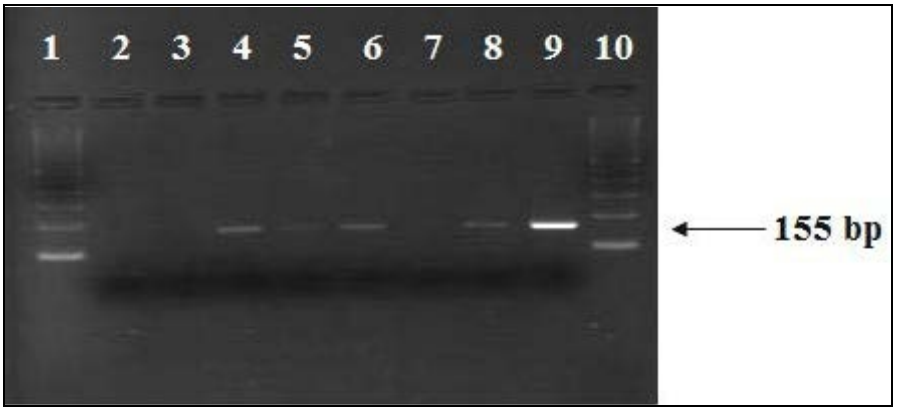

Supplement: MOESM4 [file 9443510]
